# Supplementary material
Source: publisher site journal article supplement (https://www.dovepress.com/article/260477)
Supplement: Supplementary file 1 [file get_supplementary_file.php]

*Supplementary materials for*

**Self-assembled dual-targeted epirubicin-hybrid polydopamine nanoparticles for** **combined chemo-photothermal therapy of triple-negative breast cancer**

Xiang Li1,*, Qian Zou1,*, Jing Zhang[[1]](#footnote-1)2, Peng Zhang2, Xiong Zhou1, Satya Siva Kishan Yalamarty4,Xinli Liang2, Yali Liu3, Qin Zheng2, Jianqing Gao5

*1State Key Laboratory of Innovative Drug and Efficient Energy-Saving Pharmaceutical Equipment, Jiangxi University of Traditional Chinese Medicine, Nanchang 330006, Jiangxi, China; 2Key Laboratory of Modern Preparation of TCM, Ministry of Education, Jiangxi University of Traditional Chinese Medicine, Nanchang 330004, Jiangxi, China; 3College of Science and Technology, Jiangxi University of Traditional Chinese Medicine, Nanchang 330004, Jiangxi, China; 4Center for Pharmaceutical Biotechnology and Nanomedicine, Northeastern University, Boston, Massachusetts 02115, United States; 5Institute of Pharmaceutics, College of Pharmaceutical Sciences, Zhejiang University, Hangzhou 310058, Zhejiang, China*

*** These authors contributed equally to the work**


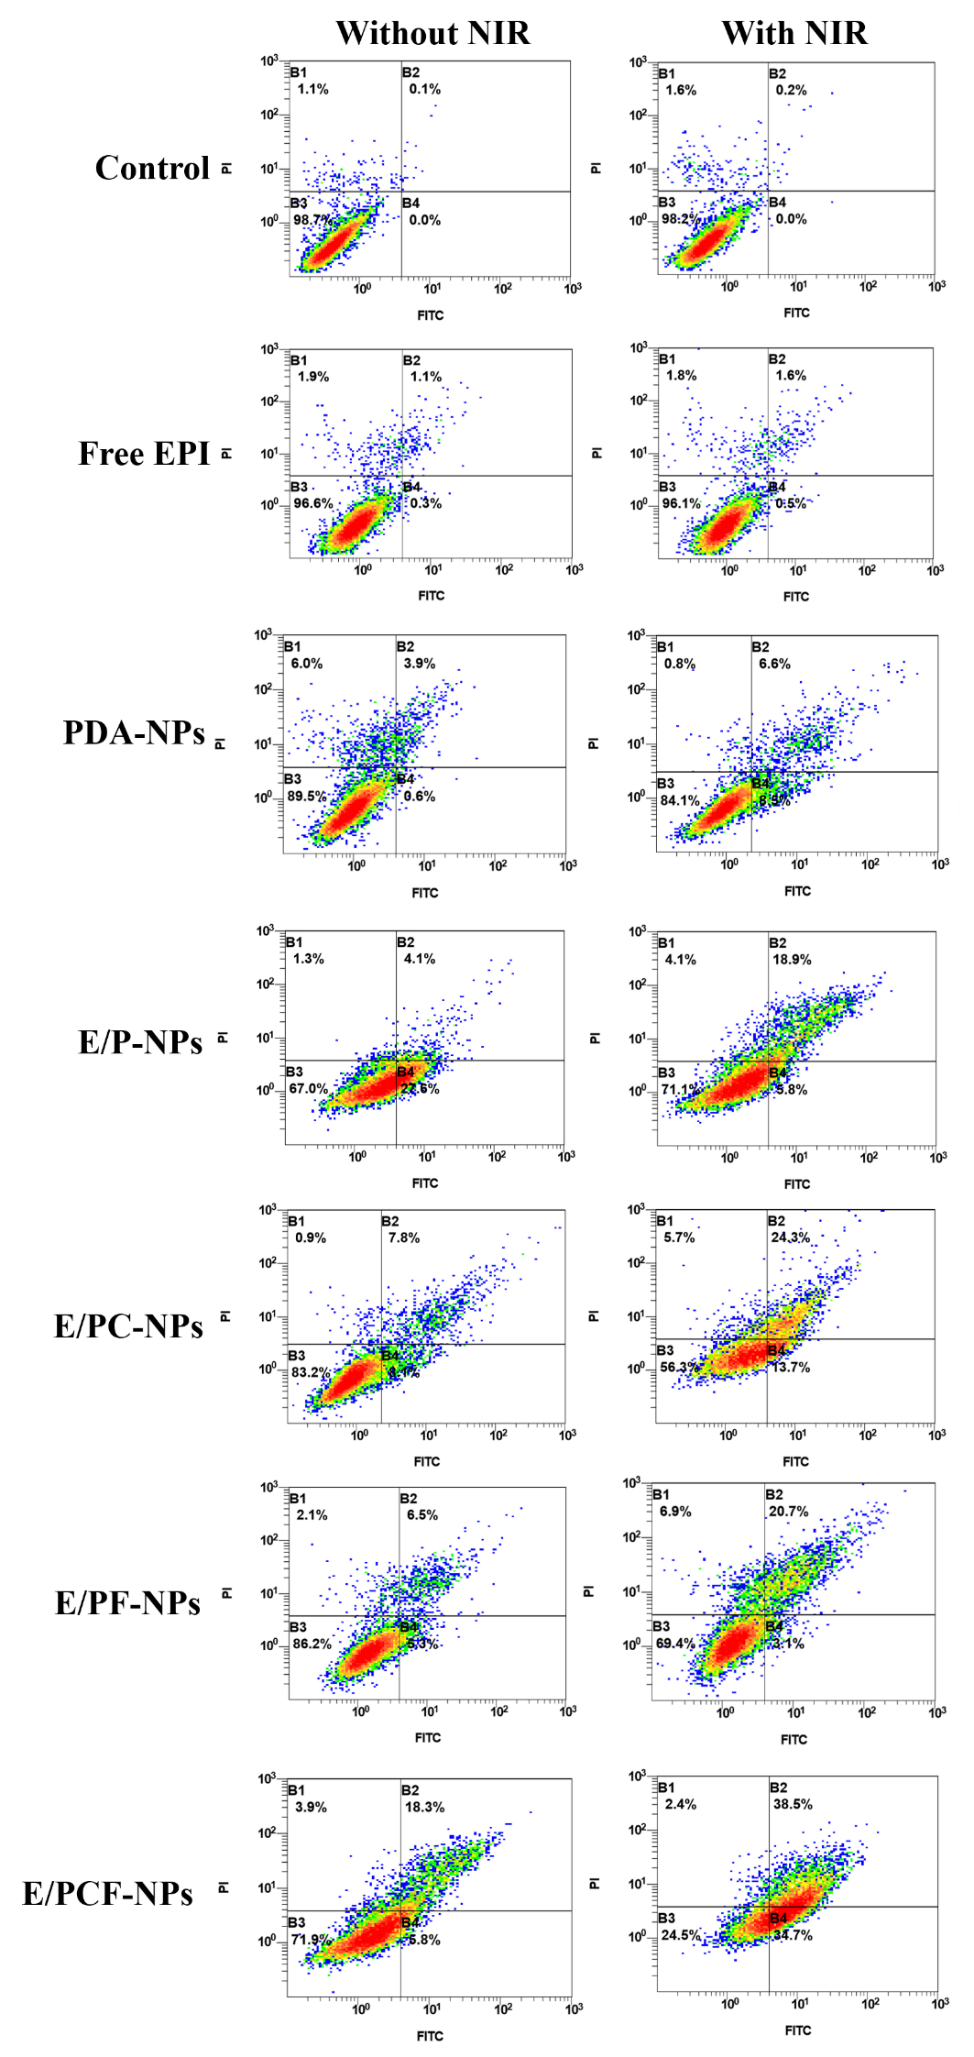


Figure S1. Apoptosis of 4T1 cells treated with different preparations by Annexin V/PI staining using flow cytometry.

Table S1. The abbreviation and full name of each preparation

| Abbreviations | Full names |
| --- | --- |
| Free EPI | Free EPI solution |
| PDA-NPs | PDAC cores modified with DMPG and DSPE-PEG2000 |
| E/P-NPs | PDAC cores modified with DMPG and DSPE-PEG2000, and loaded with EPI |
| E/PC-NPs | PDAC cores modified with DMPG, DSPE-PEG2000 and DSPE-PEG2000-cRGD, and loaded with EPI |
| E/PF-NPs | PDAC cores modified with DMPG, DSPE-PEG2000 and DSPE-PEG2000-FA, and loaded with EPI |
| E/PCF-NPs | PDAC cores modified with DMPG, DSPE-PEG2000, DSPE-PEG2000-cRGD and DSPE-PEG2000-FA, and loaded with EPI |

Table S2. The effects of four amino acids on the size distribution of hybrid PDA particles

| Amino acids | Size (nm) | PDI |
| --- | --- | --- |
| \ | 190.0 | 0.125 |
| L-cysteine | 88.8 | 0.076 |
| Histidine | 133.2 | 0.390 |
| Lysine | 141.6 | 0.219 |
| Arginine | 443.6 | 0.796 |

Table S3. Stability of PDA-NPs, E/P-NPs, and E/PCF-NPs in one week at 4°C

|  | Time (h) | 0 | 24 | 48 | 96 | 120 | 168 |
| --- | --- | --- | --- | --- | --- | --- | --- |
| PDA-NPs | Z-avg/nm | 91.57±2.5 | 107.5±1.86 | 107.9±2.38 | 101.9±3.65 | 105.9±3.18 | 93.09±2.22 |
|  | PDI | 0.083±0.04 | 0.142±0.04 | 0.086±0.03 | 0.107±0.01 | 0.061±0.01 | 0.198±0.06 |
| E/P-NPs | Z-avg/nm | 117.5±2.6 | 111.9±1.11 | 111.6±3.45 | 105.1±4.38 | 107.1±2.86 | 104.2±2.7 |
|  | PDI | 0.152±0.01 | 0.267±0.01 | 0.233±0.04 | 0.234±0.03 | 0.260±0.01 | 0.254±0.02 |
| E/PCF-NPs | Z-avg/nm | 109.9±3.47 | 102.2±2.38 | 104.1±2.12 | 103.8±2.95 | 97.91±2.6 | 99.91±1.99 |
|  | PDI | 0.207±0.04 | 0.258±0.01 | 0.265±0.05 | 0.241±0.04 | 0.255±0.04 | 0.255±0.03 |

Table S4. Stability of PDA-NPs, E/P-NPs, and E/PCF-NPs in FBS-containing complete culture medium for 24 h

|  | Time (h) | 0 | 6 | 12 | 24 |
| --- | --- | --- | --- | --- | --- |
| PDA-NPs | Z-avg/nm | 152.90±0.8 | 155.97±3.47 | 155.93±1.15 | 157.13±1.43 |
|  | PDI | 0.23±0.01 | 0.26±0.01 | 0.23±0.01 | 0.23±0.01 |
| E/P-NPs | Z-avg/nm | 178.00±3.69 | 215.80±1.14 | 223.90±3.34 | 227.47±4.75 |
|  | PDI | 0.26±0.03 | 0.28±0.02 | 0.20±0.002 | 0.25±0.05 |
| E/PCF-NPs | Z-avg/nm | 171.67±1.20 | 193.37±0.36 | 204.43±2.11 | 205.43±2.76 |
|  | PDI | 0.25±0.05 | 0.24±0.04 | 0.23±0.05 | 0.23±0.02 |

1. Correspondence: Jing Zhang

   Key Laboratory of Modern Preparation of TCM, Ministry of Education, Jiangxi University of Traditional Chinese Medicine, Nanchang 330004, Jiangxi, China; Tel +86 791 87118658; Fax +86 79187118658; Email 20101036@jxutcm.edu.cn [↑](#footnote-ref-1)
